# Supplementary material for: Electronic bypass of spinal lesions: activation of lower motor neurons directly driven by cortical neural signals
Source: PubMed Central journal article supplement (PMC4094416; doi:10.1186/1743-0003-11-107), 2014-07-03

**a**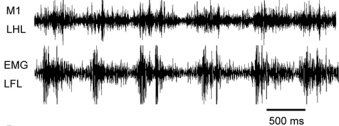**b**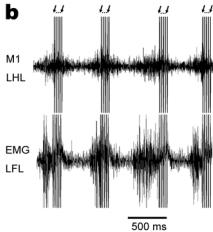**c**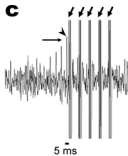

Supplement: 1743-0003-11-107-S2.pdf [file 1743-0003-11-107-S2.pdf]
